# Supplementary material for: Neurotrophin receptor tyrosine kinases regulated with near-infrared light
Source: PubMed Central journal article supplement (PMC6408446; doi:10.1038/s41467-019-08988-3), 2019-03-08
Supplement: 41467_2019_8988_MOESM1_ESM.pdf [file 41467_2019_8988_MOESM1_ESM.pdf]

# **Neurotrophin receptor tyrosine kinases regulated with near-infrared light**

Anna V. Leopold, Konstantin G. Chernov, Anton A. Shemetov and Vladislav V. Verkhusha

Supplementary Information

**Supplementary Table 1.** List of major plasmids designed in this study.

| Plasmid                          | Vector backbone | Promoter | Insert                                                                                        |
|----------------------------------|-----------------|----------|-----------------------------------------------------------------------------------------------|
| pCMVd2-DrBphP-PCM-TrkB           | pCMVd2          | CMVd2    | <i>HindIII</i> -Myr-3xSAG-Dr- <i>KpnI</i> -TrkB- <i>XhoI</i>                                  |
| pCMVd2-Dr-hel1-TrkB              | pCMVd2          | CMVd2    | <i>HindIII</i> -Myr-3xSAG-Dr-hel1-TrkB- <i>XhoI</i>                                           |
| pCMVd2-Dr-hel2-TrkB              | pCMVd2          | CMVd2    | <i>HindIII</i> -Myr-3xSAG-Dr-hel2-TrkB- <i>XhoI</i>                                           |
| pCMVd2-Dr-hel3-TrkB              | pCMVd2          | CMVd2    | <i>HindIII</i> -Myr-3xSAG-Dr-hel3-TrkB- <i>XhoI</i>                                           |
| pCMVd2-Dr-hel4-TrkB              | pCMVd2          | CMVd2    | <i>HindIII</i> -Myr-3xSAG-hel4-TrkB- <i>XhoI</i>                                              |
| pCMVd2-Dr-hel5-TrkB              | pCMVd2          | CMVd2    | <i>HindIII</i> -Myr-3xSAG-hel5-TrkB- <i>XhoI</i>                                              |
| pCMVd2-Dr-DHp-TrkB               | pCMVd2          | CMVd2    | <i>HindIII</i> -Myr-3xSAG-Dr-M614-TrkB- <i>XhoI</i>                                           |
| pCMVd2-Dr-hel1-TrkA              | pCMVd2          | CMVd2    | <i>HindIII</i> -Myr-3xSAG-Dr-hel1-TrkB- <i>XhoI</i>                                           |
| pCMVd2-Dr-hel2-TrkA              | pCMVd2          | CMVd2    | <i>HindIII</i> -Myr-3xSAG-Dr-hel2-TrkB- <i>XhoI</i>                                           |
| pCMVd2-Dr-hel3-TrkA              | pCMVd2          | CMVd2    | <i>HindIII</i> -Myr-3xSAG-Dr-hel3-TrkB- <i>XhoI</i>                                           |
| pCMVd2-Dr-hel4-TrkA              | pCMVd2          | CMVd2    | <i>HindIII</i> -Myr-3xSAG-Dr-hel4-TrkB- <i>XhoI</i>                                           |
| pCMVd2-Dr-hel5-TrkA              | pCMVd2          | CMVd2    | <i>HindIII</i> -Myr-3xSAG-Dr-hel5-TrkB- <i>XhoI</i>                                           |
| pcDNA3.1+-EGFP-PH-Akt-IRES2-TrkA | pcDNA3.1+       | CMV      | <i>NheI</i> -PH-Akt-BamHI-EGFP-EcoRI-IRES2- <i>Sall</i> -Myr-3xSAG -Dr-hel4-TrkA- <i>XhoI</i> |
| pcDNA3.1+-EGFP-PH-Akt            | pcDNA3.1+       | CMV      | <i>NheI</i> -PH-Akt-BamHI-EGFP-EcoRI                                                          |
| pEGFP-IRES2-Dr-TrkA              | pEGFP-C1        | CMV      | <i>EcoRI</i> -IRES2- <i>Sall</i> -Myr-3xSAG Dr-hel4-TrkA- <i>XhoI</i>                         |
| pEGFP-IRES2-Dr-TrkB              | pEGFP-C1        | CMV      | <i>EcoRI</i> -IRES2- <i>Sall</i> -Myr-3xSAG -Dr-hel4-TrkA- <i>XhoI</i>                        |
| pKA-Dr-hel4-TrkA                 | pKA             | CMV      | <i>AgeI</i> -Dr-hel4-TrkA- <i>XhoI</i>                                                        |
| pKA-Dr-hel4-TrkB                 | pKA             | CMV      | <i>AgeI</i> -Dr-hel4-TrkB- <i>XhoI</i>                                                        |
| cyto-Dr-TrkA                     | pCMVd2          | CMVd2    | pCMVd2- <i>HindIII</i> -Dr-hel4-TrkA- <i>XhoI</i>                                             |
| cyto-Dr-TrkB                     | pCMVd2          | CMVd2    | pCMVd2- <i>HindIII</i> -Dr-hel4-TrkB- <i>XhoI</i>                                             |
| pcDNA3.1+-PDZ-mCherry-Dr-TrkA    | pcDNA3.1+       | CMV      | <i>HindIII</i> -PDZ-mCherry-3xSAG-Dr-hel4-TrkA- <i>BamHI</i>                                  |
| pcDNA3.1+-PDZ-Dr-TrkA            | pcDNA3.1+       | CMV      | <i>HindIII</i> -PDZ-3xSAG-Dr-hel4-TrkA- <i>BamHI</i>                                          |
| pcDNA3.1+-Myr-Cherry-Dr-TrkA     | pcDNA3.1+       | CMV      | <i>HindIII</i> -Myr-mCherry-3xSAG-Dr-hel4-TrkA- <i>BamHI</i>                                  |
| pcDNA3.1+-mCherry-Dr-TrkA        | pcDNA3.1+       | CMV      | <i>HindIII</i> -mCherry-3xSAG-Dr-hel4-TrkA- <i>BamHI</i>                                      |
| pcDNA3.1+Myr-Cherry-Dr-TrkB      | pcDNA3.1+       | CMV      | <i>HindIII</i> -Myr-mCherry-3xSAG-Dr-hel4-TrkB- <i>XhoI</i>                                   |
| pAAV-CW3SL-Myr-Cherry-Dr-TrkA    | pAAV-CW3SL      | CaMKII   | <i>HindIII</i> -Myr-mCherry-Dr-TrkA- <i>XhoI</i>                                              |

**Supplementary Table 2.** Protein sequences of major proteins designed in this study.

|         |                                                                                                                                                                                                                                                                                                                                                                                                                                                                                                                                                                                                                                                                                                                                                                                                                                                                                                                                                                                                                                                                                                      |
|---------|------------------------------------------------------------------------------------------------------------------------------------------------------------------------------------------------------------------------------------------------------------------------------------------------------------------------------------------------------------------------------------------------------------------------------------------------------------------------------------------------------------------------------------------------------------------------------------------------------------------------------------------------------------------------------------------------------------------------------------------------------------------------------------------------------------------------------------------------------------------------------------------------------------------------------------------------------------------------------------------------------------------------------------------------------------------------------------------------------|
| Dr-TrkA | <p><b>MGCIKSKRKDA</b>LYKEFSAGSAGSAGMSRDPLPFFPPLYLGGPEI<br/> TTENCEREPIHIPGSIQPHGALLTADGHSGEVLQMSLNAATFLG<br/> QEPTVLRGQTLAALLPEQWPALQAALPPGCPDALQYRATLDW<br/> PAAGHLSLTVHRVGELLILEFEPTAWDSTGPHALRNAMFALE<br/> SAPNLRALAEVATQTVRELTFDRVMLYKFAPDATGEVIAEAR<br/> REGLHAFLGHRFPASDIPAQARALYTRHLLRLTADTRAAAVPL<br/> DPVLNPQTNAPTPLGGAVLRATSPMHMQYLRLNMGVGSLSVS<br/> VVVGGQLWGLIACHHQTPYVLPDLRTTLEYLGRLLSLQVQVK<br/> EAADVAAFRQSLREHHARVALAAHSLSPHDTLSDPALDLLGL<br/> MRAGGLILRFEGRWQTLGEVPPAPAVDALLAWLETQPGALVQ<br/> TDALGQLWPAGADLAPSAAGLLAISVGEGWSECLVWLRPELR<br/> LEVAWGGATPDQAKDDLGP R H S F D T Y L E E K R G Y A E P W H P G E I<br/> EEAQDLRDTLTGALGEAEAAAKEAAAKEAAAKEAAAKANKC<br/> GQRSKFGINRPVLAPEGLAMSLHFMTLGGSSLSPTTEGKGS<br/> LQGHIMENPQYFSDTCVHHIKRQDIILKWELEGAFGKVFLAEC<br/> YNLLNDQDKMLVAVKALKETSEARQDFHREAELLTMLQHQ<br/> HIVRFFGVCTEGGPLLMVFYMRHGDLNRFLRSHGPDAKLLAG<br/> GEDVAPGPLGLGQLLAVASQVAAGMVYLASLHFVHRDLATRN<br/> CLVGQGLVVKIGDFGMSRDIYSTDYRVGGRTMLPIRWMPPES<br/> ILYRKSTESDVWSFGVVLWEIFTYGKQPWYQLSNTEAIECITQ<br/> GRELERPRACPPDVYAIMRGCWQREPQQRLSMKDVHARLQAL<br/> AQAPPSYLDVLG</p> |
| Dr-TrkB | <p><b>MGCIKSKRKDA</b>LYKEFSAGSAGSAGMSRDPLPFFPPLYLGGPEI<br/> TTENCEREPIHIPGSIQPHGALLTADGHSGEVLQMSLNAATFLG<br/> QEPTVLRGQTLAALLPEQWPALQAALPPGCPDALQYRATLDW<br/> PAAGHLSLTVHRVGELLILEFEPTAWDSTGPHALRNAMFALE<br/> SAPNLRALAEVATQTVRELTFDRVMLYKFAPDATGEVIAEAR<br/> REGLHAFLGHRFPASDIPAQARALYTRHLLRLTADTRAAAVPL<br/> DPVLNPQTNAPTPLGGAVLRATSPMHMQYLRLNMGVGSLSVS<br/> VVVGGQLWGLIACHHQTPYVLPDLRTTLEYLGRLLSLQVQVK<br/> EAADVAAFRQSLREHHARVALAAHSLSPHDTLSDPALDLLGL<br/> MRAGGLILRFEGRWQTLGEVPPAPAVDALLAWLETQPGALVQ<br/> TDALGQLWPAGADLAPSAAGLLAISVGEGWSECLVWLRPELR<br/> LEVAWGGATPDQAKDDLGP R H S F D T Y L E E K R G Y A E P W H P G E I<br/> EEAQDLRDTLTGALGEAEAAAKEAAAKEAAAKEAAAKAKLA<br/> RHSKFGMKGPASVISNDDDSASPLHHISNGSNTPSSEGGPDAVI<br/> IGMTKIPVIENPQYFGITNSQLKPDFTVQHIKRHNIVLKRELGEG<br/> AFGKVFLAECYNLCPEQDKILVAVKTLKDASDNARKDFHREAE<br/> LLTNLQHEHIVKfygvcvegdplimvfeymkhgdlnkflrah<br/> GPDAVLMAEGNPTELTSQMLHIAQQAAGMVYLASQHFVH<br/> RDLATRNCLVGENLLVKIGDFGMSRDVYSTDYRVGGHTMLP<br/> IRWMPPESIMYRKFTTESDVWSLGVVLWEIFTYGKQPWYQLSN</p>                                                               |

|                 |                                                                                                                                                                                                                                                                                                                                                                                                                                                                                                                                                                                                                                                                                                                                                                                                                                                                                                                                                                                                             |
|-----------------|-------------------------------------------------------------------------------------------------------------------------------------------------------------------------------------------------------------------------------------------------------------------------------------------------------------------------------------------------------------------------------------------------------------------------------------------------------------------------------------------------------------------------------------------------------------------------------------------------------------------------------------------------------------------------------------------------------------------------------------------------------------------------------------------------------------------------------------------------------------------------------------------------------------------------------------------------------------------------------------------------------------|
|                 | NEVIECITQGRVLRPRTCPQEVYELMLGCWQREPHTRKNIKNI<br>HTLLQNLAKASPVYLDILG                                                                                                                                                                                                                                                                                                                                                                                                                                                                                                                                                                                                                                                                                                                                                                                                                                                                                                                                          |
| cyto-Dr-TrkA    | MSRDPLPFFPPLYLGGPEITTENCEREPIHIPGSIQPHGALLTADG<br>HSGEVLQMSLNAATFLGQEPTVLRGQTLAALLPEQWPALQAA<br>LPPGCPDALQYRATLDWPAAGHLSLTVHRVGELLILEFEPT<br>WDSTGPHALRNAMFALESAPNLRALAEVATQTVRELTGFDRV<br>MLYKFAPDATGEVIAEARREGLHAFLGHRFPASDIPAQARALY<br>TRHLLRLTADTRAAAVPLDPVLPQTNAPTPLGGAVLRATSPM<br>HMQYLRNMGVGSLSVSVVVGGLWGLIACHHQTYPVLPDDL<br>RTTLEYLGRLLSLQVQVKEAADVAEFRQSLREHHARVALAAA<br>HSLSPHDTLSDPALDLLGLMRAGGLILRFEGRWQTLGEVPPAP<br>AVDALLAWLETQPGALVQTDALGQLWPAGADLAPSAAGLLAI<br>SVGEGWSECLVWLRPELRLEVAWGGATPDQAKDDLGP<br>RHSFD<br>TYLEEKRGY AEPWHPGEIEEAQDLRDTLTGALGEAEAAAKEA<br>AAKEAAAKEAAAKANKCGQRSKFGINRAVLAPEDGLAMSLH<br>FMTLGGSSLSPTTEGKGSGLQGHIMENPQYFSDTCVHHIKRQDII<br>LKWELGEGAFGKVFLAECYNLLNDQDKMLVAVKALKETSEN<br>ARQDFHREAELLTMLQHQHIVRFFGVCTEGGPLLMVFEYMRH<br>GDLNRFLRSHGPDAKLLAGGEDVAPGPLGLGQLLAVASQVAA<br>GMVYLASLHFVHRDLATRNLVGGQLVVKIGDFGMSRDIYST<br>DYRVRGGRTMLPIRWMPESILYRKSTESDVWSFGVVLWEIF<br>TYGKQPWYQLSNTEAIECITQGRELERPRACPPDVYAIMRGCW<br>QREPQQRLSMKDVHARLQALAQAPPSYLDVLG            |
| cyto-Dr-TrkB    | MSRDPLPFFPPLYLGGPEITTENCEREPIHIPGSIQPHGALLTADG<br>HSGEVLQMSLNAATFLGQEPTVLRGQTLAALLPEQWPALQAA<br>LPPGCPDALQYRATLDWPAAGHLSLTVHRVGELLILEFEPT<br>WDSTGPHALRNAMFALESAPNLRALAEVATQTVRELTGFDRV<br>MLYKFAPDATGEVIAEARREGLHAFLGHRFPASDIPAQARALY<br>TRHLLRLTADTRAAAVPLDPVLPQTNAPTPLGGAVLRATSPM<br>HMQYLRNMGVGSLSVSVVVGGLWGLIACHHQTYPVLPDDL<br>RTTLEYLGRLLSLQVQVKEAADVAEFRQSLREHHARVALAAA<br>HSLSPHDTLSDPALDLLGLMRAGGLILRFEGRWQTLGEVPPAP<br>AVDALLAWLETQPGALVQTDALGQLWPAGADLAPSAAGLLAI<br>SVGEGWSECLVWLRPELRLEVAWGGATPDQAKDDLGP<br>RHSFD<br>TYLEEKRGY AEPWHPGEIEEAQDLRDTLTGALGEAEAAAKEA<br>AAKEAAAKEAAAKAKLARHSKFGMKGPASVISNDDDSASPLH<br>HISNGSNTPSSSEGGPDAVIIGMTKIPVIENPQYFGITNSQLKPD<br>T<br>FVQHIKRHNIVLKRELGEAFGKVFLAECYNLCPEQDKILVAV<br>KTLKDASDNARKDFHREAELLTNLQHEHIVKFYGVCEGDPLI<br>MVFEYMKHGDLNKFLRAHGPDAVLMAEGNPTELTSQSQLHI<br>AQQAAGMVYLASQHFVHRDLATRNLVGENLLVKIGDFGMS<br>RDVYSTDYRVRGGHTMLPIRWMPESIMYRKFTTESDVWSLG<br>VVLWEIFTYGKQPWYQLSNNEVIECITQGRVLRPRTCPQEVY<br>ELMLGCWQREPHTRKNIKNIHTLLQNLAKASPVYLDILG |
| DrBphP-PCM-TrkB | MGCIKSKRKDALYKEFSAGSAGSAGMSRDPLPFFPPLYLGGPEI<br>TTENCEREPIHIPGSIQPHGALLTADGHSGEVLQMSLNAATFLG                                                                                                                                                                                                                                                                                                                                                                                                                                                                                                                                                                                                                                                                                                                                                                                                                                                                                                                |

|                                 |                                                                                                                                                                                                                                                                                                                                                                                                                                                                                                                                                                                                                                                                                                                                                                                                                                                                                                                                                                                                                                                                                                                                                                            |
|---------------------------------|----------------------------------------------------------------------------------------------------------------------------------------------------------------------------------------------------------------------------------------------------------------------------------------------------------------------------------------------------------------------------------------------------------------------------------------------------------------------------------------------------------------------------------------------------------------------------------------------------------------------------------------------------------------------------------------------------------------------------------------------------------------------------------------------------------------------------------------------------------------------------------------------------------------------------------------------------------------------------------------------------------------------------------------------------------------------------------------------------------------------------------------------------------------------------|
|                                 | <p>QEPTVLRGQTLAALLPEQWPALQAALPPGCPDALQYRATLDW<br/> PAAGHLSLTVHRVGELLILEFEPTAWDSTGPHALRNAMFALE<br/> SAPNLRALAEVATQTVRELTFDRVMLYKFAPDATGEVIAEAR<br/> REGLHAFLGHRFPASDIPAQARALYTRHLLRLTADTRAAAVPL<br/> DPVLNPQTNAPTPLGGAVLRATSPMHMQYLRNMGVGSSLSVS<br/> VVVGGQLWGLIACHHQTPYVLPDLRTTLEYLGRLLSLQVQVK<br/> EAADVAAFRQSLREHHARVALAAHSLSPHDTLSDPALDLLGL<br/> MRAGGLILRFEGRWQTLGEVPPAPAVDALLAWLETQPGALVQ<br/> TDALGQLWPAGADLAPSAAGLLAISVGEGWSECLVWLRPELR<br/> LEVAWGGATPDQAKDDLGP RHSFDTYLEEKRGY AEPWHPGEI<br/> EEAQDLRDTLTGALGEK LARHSKFGMKGPASVISNDDDSASPL<br/> HHISNGSNTPSSEGGPDAVIIGMTKIPVIENPQYFGITNSQLKPD<br/> TFVQHIKRHNIVLKRELGE GAFGKVFLAECYNLCPEQDKILVAV<br/> KTLKDASDNARKDFHREAELLTNLQHEHIVKFGYVCVEGDPLI<br/> MVFEYMKHGDLNKFLRAHGPDAVLMAEGNPTELTSQMLHI<br/> AQQAAGMVYLASQHFVHRDLATRNCLVGENLLVKIGDFGMS<br/> RDVYSTDYR VGGHTMLPIRWMPPE SIMYRKFTTESDVWSLG<br/> VVLWEIFTY GKQPWYQLSNNEVIECITQGRVLRPRTC PQEVY<br/> ELMLGCWQREPHTRKNIKNIHTLLQNLAKASPVYLDILG</p>                                                                                                                                                                                                                 |
| <p>DrBphP-PCM-DHp-<br/>TrkB</p> | <p>MGCIKSKRKDALYKEFSAGSAGSAGMSRDPLPFFPPLYLGGPEI<br/> TTENCEREPIHIPGSIQPHGALLTADGHSGEVLQMSLNAATFLG<br/> QEPTVLRGQTLAALLPEQWPALQAALPPGCPDALQYRATLDW<br/> PAAGHLSLTVHRVGELLILEFEPTAWDSTGPHALRNAMFALE<br/> SAPNLRALAEVATQTVRELTFDRVMLYKFAPDATGEVIAEAR<br/> REGLHAFLGHRFPASDIPAQARALYTRHLLRLTADTRAAAVPL<br/> DPVLNPQTNAPTPLGGAVLRATSPMHMQYLRNMGVGSSLSVS<br/> VVVGGQLWGLIACHHQTPYVLPDLRTTLEYLGRLLSLQVQVK<br/> EAADVAAFRQSLREHHARVALAAHSLSPHDTLSDPALDLLGL<br/> MRAGGLILRFEGRWQTLGEVPPAPAVDALLAWLETQPGALVQ<br/> TDALGQLWPAGADLAPSAAGLLAISVGEGWSECLVWLRPELR<br/> LEVAWGGATPDQAKDDLGP RHSFDTYLEEKRGY AEPWHPGEI<br/> EEAQDLRDTLTGALGERLSVIRDLNRALTQSNAEWRQYGFVIS<br/> HHMQEPVRLISQFAELLTRQPRAQDGSPDSPQTERITGFLRET<br/> RLRSLTQDLHTYTALLSAPPPKLARHSKFGMKGPASVISNDDDS<br/> ASPLHHISNGSNTPSSEGGPDAVIIGMTKIPVIENPQYFGITNSQ<br/> LKPDTFVQHIKRHNIVLKRELGE GAFGKVFLAECYNLCPEQDKI<br/> LVAVKTLKDASDNARKDFHREAELLTNLQHEHIVKFGYVCVE<br/> GDPLIMVFEYMKHGDLNKFLRAHGPDAVLMAEGNPTELTSQ<br/> QMLHIAQQAAGMVYLASQHFVHRDLATRNCLVGENLLVKIG<br/> DFGMSRDVYSTDYR VGGHTMLPIRWMPPE SIMYRKFTTESD<br/> VWSLGVVLWEIFTY GKQPWYQLSNNEVIECITQGRVLRPRTC<br/> PQEVYELMLGCWQREPHTRKNIKNIHTLLQNLAKASPVYLDIL<br/> G</p> |
| <p>PDZ-Dr-TrkA</p>              | <p>MAKQEIRVRVEKDPELGFSSISGGVGGRGNPFRPDDDGIFVTRVQ<br/> PEGPASKLLQPGDKIIQANGYSFINIEHGQAVSLLKTFQNTVELII<br/> VREVSAGGSAGGSAGGAKQEIRVRVEKDPELGFSSISGGVGGRG</p>                                                                                                                                                                                                                                                                                                                                                                                                                                                                                                                                                                                                                                                                                                                                                                                                                                                                                                                                                                                                                 |

|                                                                                                                                                                                                                                                                                                                                                                                                                                                                                                                                                                                                                                                                                                                                                                                                                                                                                                                                                                                                                                                                                                                                                                                                                                                                                                                                                 |
|-------------------------------------------------------------------------------------------------------------------------------------------------------------------------------------------------------------------------------------------------------------------------------------------------------------------------------------------------------------------------------------------------------------------------------------------------------------------------------------------------------------------------------------------------------------------------------------------------------------------------------------------------------------------------------------------------------------------------------------------------------------------------------------------------------------------------------------------------------------------------------------------------------------------------------------------------------------------------------------------------------------------------------------------------------------------------------------------------------------------------------------------------------------------------------------------------------------------------------------------------------------------------------------------------------------------------------------------------|
| NPFRPDDDDGIFVTRVQPEGPASKLLQPGDKIIQANGYSFINIEHG<br>QAVSLLKTFQNTVELIIVREVSRRGEEDNMAIIKEFMRFKVHMEG<br>SVNGHEFEIEGEGEGRPYEGTQTAKLKVTKGGPLPFAWDILSPQ<br>FMYGSKAYVKHPADIPDYLKLSFPEGFKWERVMNFEDGGVVT<br>VTQDSSLQDGEFIYKVKLRGTNFPDGPVMQKKTMGWEASSER<br>MYPEDGALKGEIKQRLKLDGGHYDAEVKTTYKAKKPVQLPG<br>AYNVNIKLDITSHNEDYTIVEQYERAEGRHSTGGMDELYKEFSAG<br>GSAGMSRDPLPFFPPLYLGGPEITTENCEREPIHIPGSIQPHGALLT<br>ADGHSGEVLQMSLNAATFLGQEPTVLRGQTLAALLPEQWPALQ<br>AALPPGCPDALQYRATLDWPAAGHLSLTVHRVGELLILEFEPT<br>AWDSTGPHALRNAMFALESAPNLRALAEVATQTVRELTGFDRV<br>MLYKFAPDATGEVIAEARREGLHAFLGHRFPASDIPAQARALYT<br>RHLLRLTADTRAAAVPLDPVLNPQTNAPTPLGGAVLRATSPMH<br>MQYLRNMGVVGSSLSVSVVVGGLWGLIACHHQTPYVLPDLR<br>TTLEYLGRLLSLQVQVKEAADVAEFRQSLREHHARVALAAHS<br>LSPHDTLSDPALDLLGLMRAGGLILRFEGRWQTLGEVPPAPAVD<br>ALLAWLETQPGALVQTDALGQLWPAGADLPSAAGLLAISVGE<br>GWSECLVWLRPELRLEVAWGGATPDQAKDDLGP RHSFDTYLE<br>EKRGYAEPWHPGEIEEAQDLRDTLTGALGEAEAAAKEAAAKEA<br>AAKEAAAKANKCGQRSKFGINRPAVLAPEDGLAMSLHFMTLG<br>GSSLSPTGKGSGLQGHIMENPQYFSDTCVHHIKRQDIILKWELG<br>EGAFGKVFLAECYNLLNDQDKMLVAVKALKETSEENARQDFHR<br>EAELLTMLQHQHIVRFFGVCTEGGPLLMVFEYMRHGDLNRFLR<br>SHGPDAKLLAGGEDVAPGPLGLGQLLAVASQVAAGMVYLASL<br>HFVHRDLATRNCVVGQGLVVKIGDFGMSRDIYSTDYRVGGRT<br>MLPIRWMPPELIRKFSSTESDVWSFGVVLWEIFTYGKQPWYQL<br>SNTEAIECITQGRELERPRACPPDVYAIMRGCWQREPQQRLSMK<br>DVHARLQALAQAPPSYLDVLG |
|-------------------------------------------------------------------------------------------------------------------------------------------------------------------------------------------------------------------------------------------------------------------------------------------------------------------------------------------------------------------------------------------------------------------------------------------------------------------------------------------------------------------------------------------------------------------------------------------------------------------------------------------------------------------------------------------------------------------------------------------------------------------------------------------------------------------------------------------------------------------------------------------------------------------------------------------------------------------------------------------------------------------------------------------------------------------------------------------------------------------------------------------------------------------------------------------------------------------------------------------------------------------------------------------------------------------------------------------------|

Myristoylation signal is highlighted in blue. Inserted artificial  $\alpha$ -helical linkers are highlighted in grey. SAG linker is highlighted in yellow. mCherry sequence is highlighted in red.

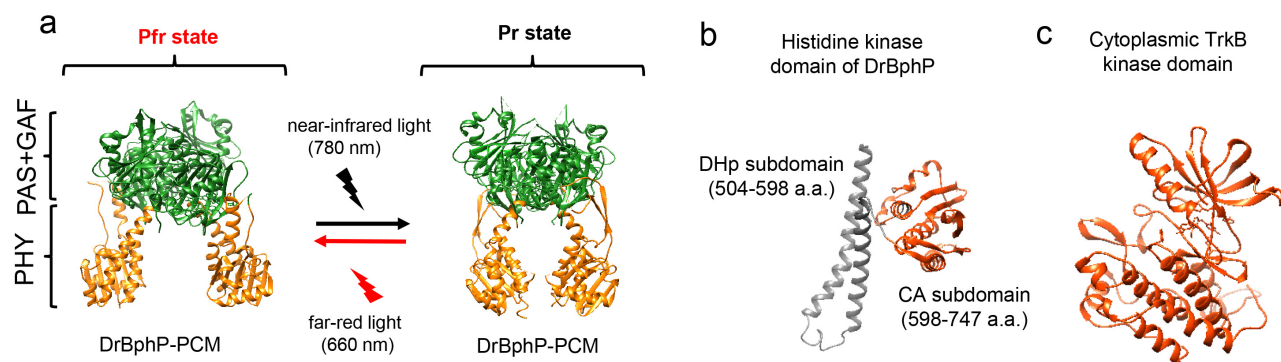

**Supplementary Figure 1. Structural modules of DrBphP and Trk proteins used to design opto-kinases.** (a) Light-induced changes in DrBphP-PCM protein upon FR (660 nm) and NIR (780 nm) light. Left is the Pfr state (PDB ID: 4O01), and right is the Pr state (PDB ID: 4O0P). (b) Structure of HK domain of DrBphP modelled on the basis of HK kinase of *Thermotoga maritima* (PDB ID:4JAV). (c) Structure of kinase domain of TrkB (PDB ID: 4ASZ).

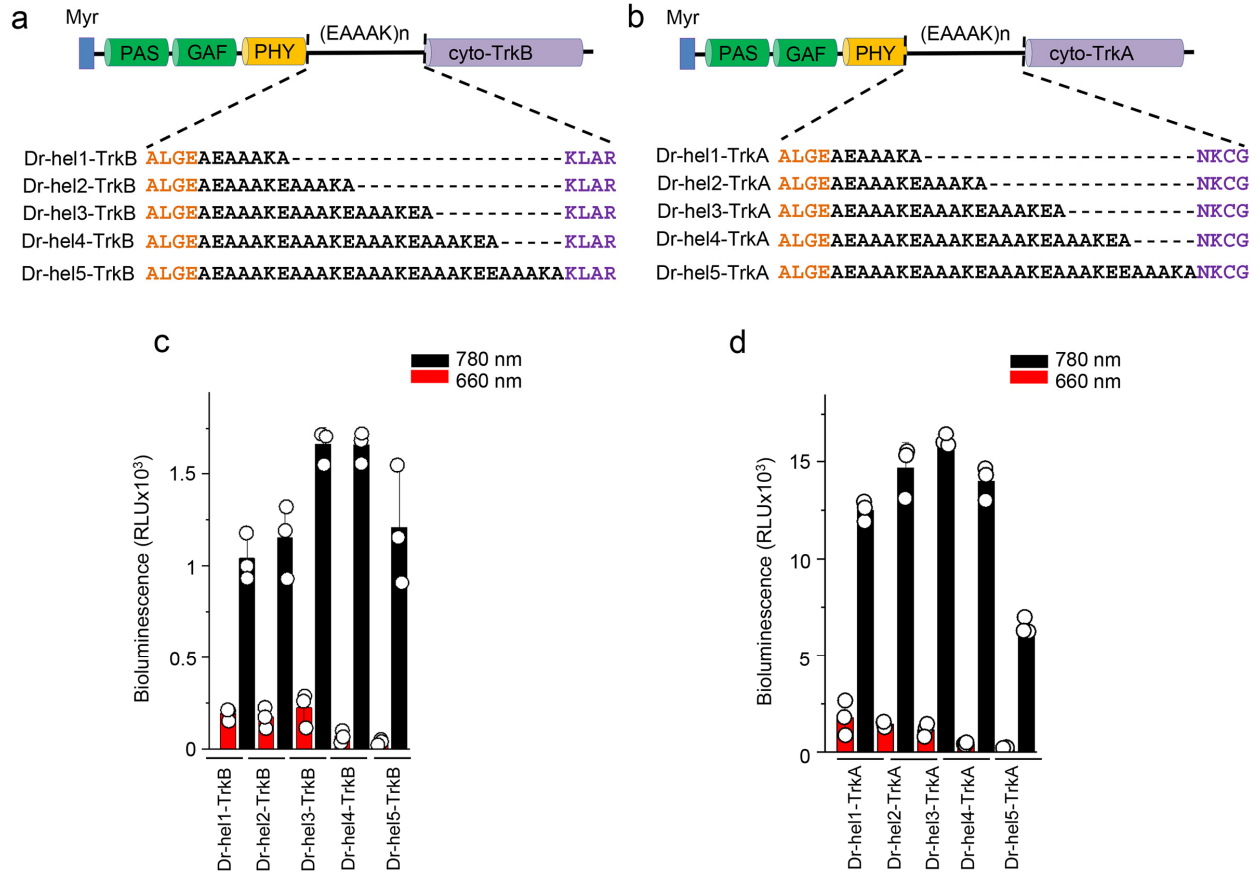

**Supplementary Figure 2. Design and screening DrBphP-PCM-cyto-Trk fusions with rigid  $\alpha$ -helical linkers of different length.** (a) Schematically depicted structures of DrBphP-PCM-cyto-TrkB constructs containing a linker with different number of  $\alpha$ -helical (hel) repeats -EAAAK-. (b) The same as in (a) but for DrBphP-PCM-cyto-TrkA constructs. (c) Luciferase assay for Elk-1-dependent transcription in PC6-3 cells expressing DrBphP-PCM-cyto-TrkB constructs shown in (a). PC6-3 cells were co-transfected with pCMVd2-DrBphP-PCM-cyto-TrkB-variant, pFR-Luc and pFA-Elk-1 plasmid mixture (mass ratio 1:100:5) for 6 h, after that medium was replaced with that without serum. Cells were grown for additional 30 h under 780 nm or 660 nm light (both 0.5 Mw cm<sup>-2</sup>), lysed and analyzed for luciferase activity. (d) The same as in (c) but for DrBphP-PCM-cyto-TrkA-variants. Error bars represent s.d., n=3 experiments.



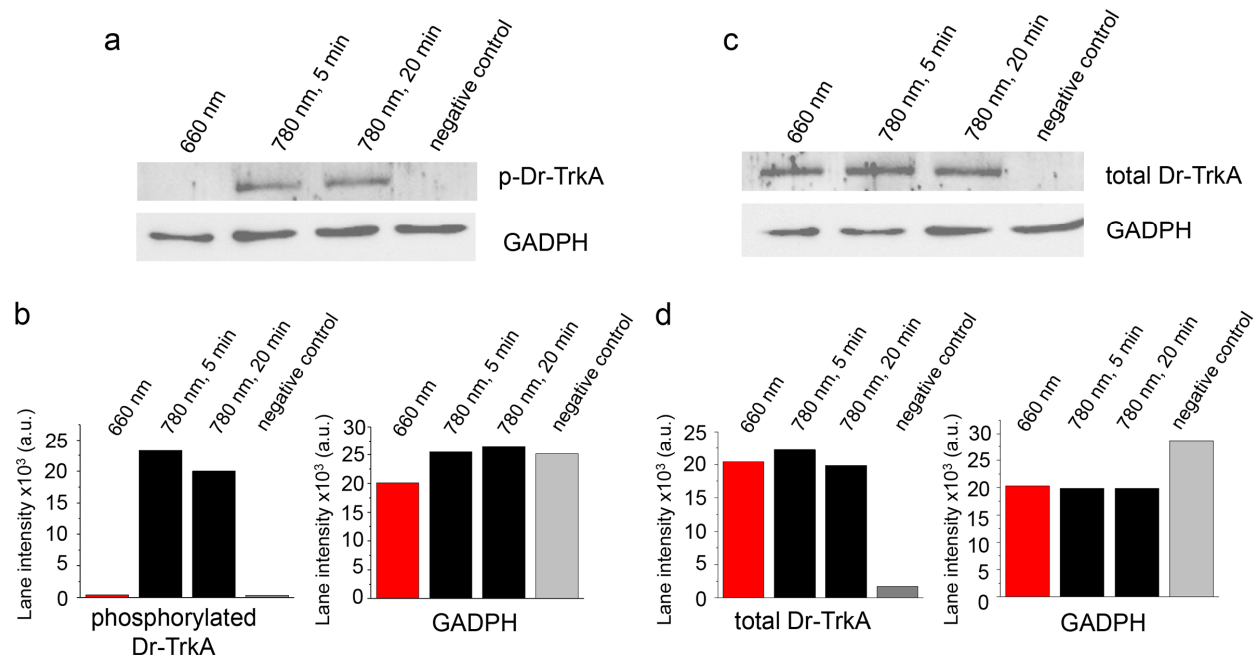

**Supplementary Figure 3. Induction of Dr-TrkA phosphorylation with near-infrared light.**

**(a)** Western blot of phosphorylated Dr-TrkA and GADPH in HeLa cells expressing Dr-TrkA. HeLa cells were transfected with Dr-TrkA, then 6 h later were illuminated with 660 nm light for 18 h before induction with 780 nm light for 5 min and 20 min, respectively. Cells were lysed, proteins were separated by SDS-PAGE, transferred to nitrocellulose membrane, and probed by the respective antibodies **(b)** Quantification of the lane intensities in panel (a). Negative control corresponds to mock-transfected cells. **(c)** Western blot of total Dr-TrkA and GADPH in the same samples as in panel (a). **(d)** Quantification of the lane intensities in panel (c). Negative control corresponds to mock-transfected cells.

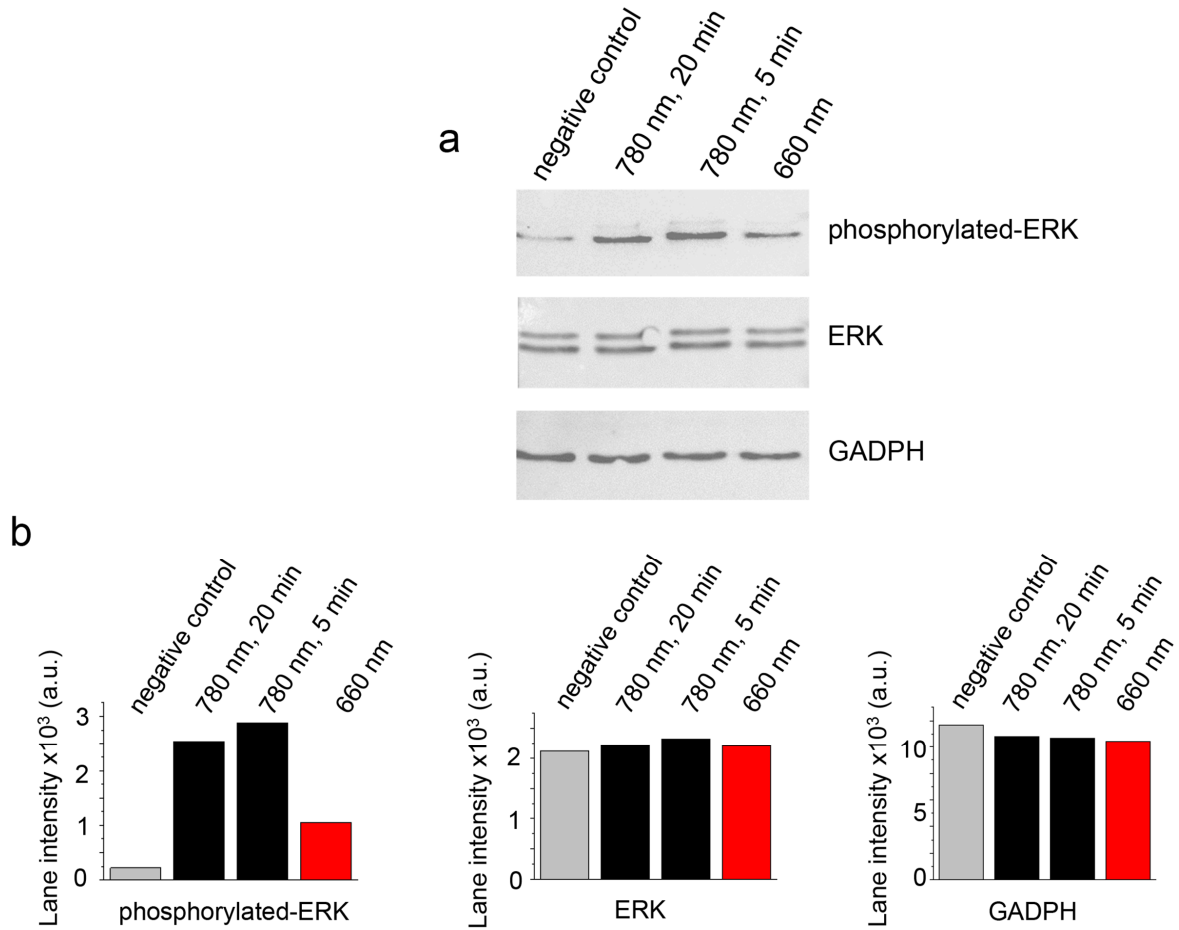

**Supplementary Figure 4. Induction of ERK phosphorylation with near-infrared light. (a)** Western blot of phosphorylated ERK, total ERK and GADPH in HeLa cells expressing Dr-TrkA. HeLa cells were transfected with Dr-TrkA, then 6 h later were illuminated with 660 nm light for 18 h before induction with 780 nm light for 5 min and 20 min, respectively. Cells were lysed, proteins were separated by SDS-PAGE, transferred to nitrocellulose membrane, and probed by anti-p-ERK rabbit antibodies (top panel). After p-ERK detection, the same membrane was stripped and re-probed with anti-ERK rabbit antibodies. After that, the same membrane was stripped and re-probed with mouse anti-GADPH antibodies. From left to right, mock-transfected cells, Dr-TrkA-expressing cells induced with 780 nm light for 20 min or 5 min, and Dr-TrkA-expressing cells kept under 660 nm light. **(b)** Quantification of the lane intensities in panel (a).

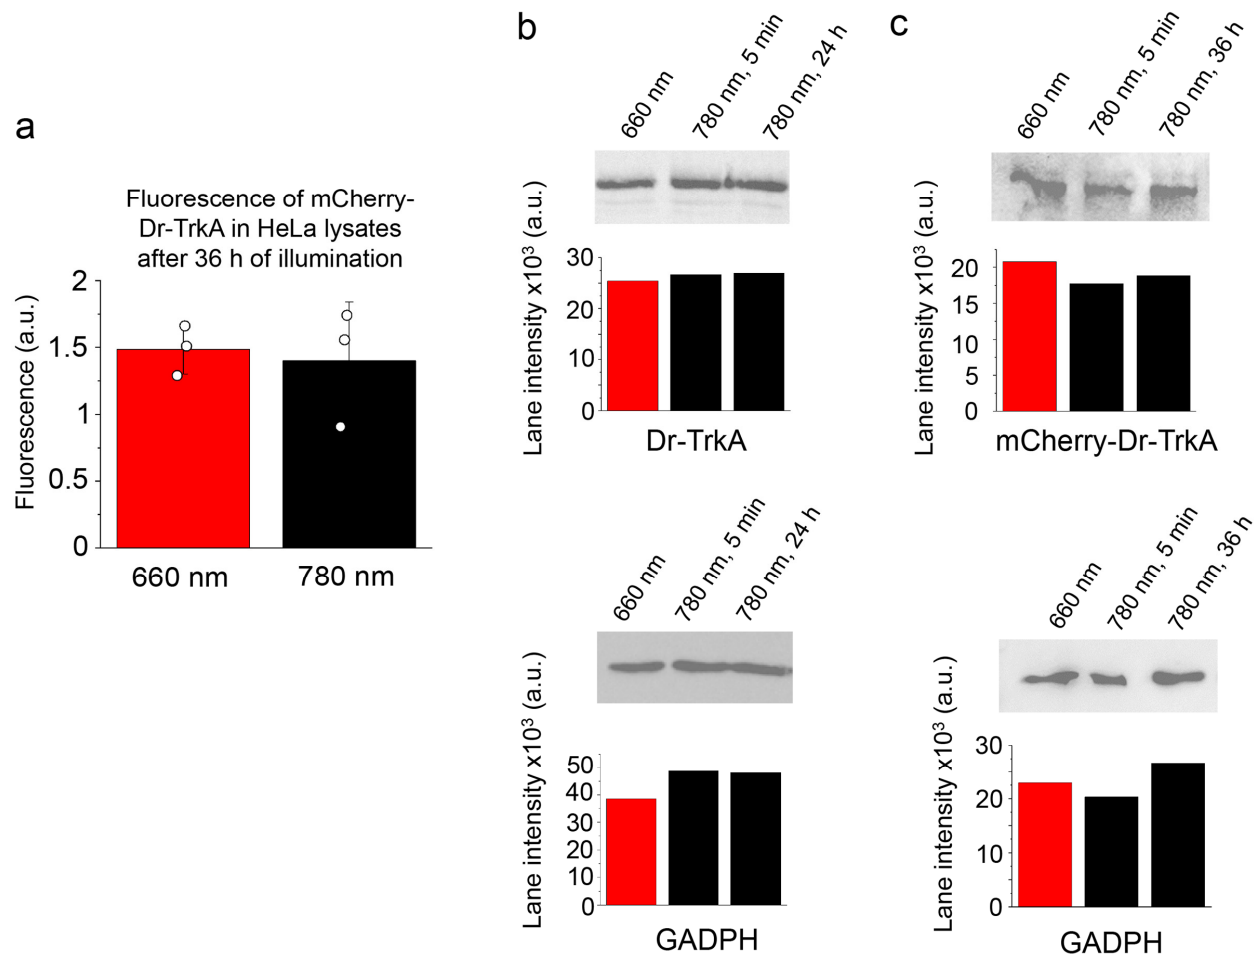

**Supplementary Figure 5. Effect of far-red and near-infrared light on stability of Dr-TrkA.** (a) HeLa cells were transfected with pcDNA-mCherry-Dr-TrkA and kept under either 660 nm or 780 nm light for 36 h. Then the cells were lysed, and mCherry fluorescence intensity in lysates was quantified with a Victor X5 plate reader using ex. 560 nm and em. 590 nm wavelengths. Error bars represent s.d.,  $n=3$  experiments. (b) Top: Western blot of total Dr-TrkA in HeLa cells, transfected with pcDNA-Dr-TrkA plasmid, kept for 24 h under either 660 nm or 780 nm light. Left to right: 660 nm illuminated cells, induced for 5 min with 780 nm light cells, and 780 nm illuminated cells, respectively. Quantification of the lane intensities is presented below. Bottom: Western blot of the same membrane stripped and re-probed with anti-GADPH antibodies. Quantification of the lane intensities is presented below. (c) Top: Western blot of total Dr-TrkA in HeLa cells transfected with pcDNA-mCherry-Dr-TrkA plasmid, kept for 36 h under either 660 nm or 780 nm light. Left to right: 660 nm illuminated cells, induced for 5 min with 780 nm light cells, and 780 nm illuminated cells, respectively. Quantification of the lane intensities is presented below. Bottom: Western blot of the same membrane stripped and re-probed with anti-GADPH antibodies. Quantification of the lane intensities is presented below. Light-dependent proteolysis was not observed for either Dr-TrkA or mCherry-Dr-TrkA proteins.

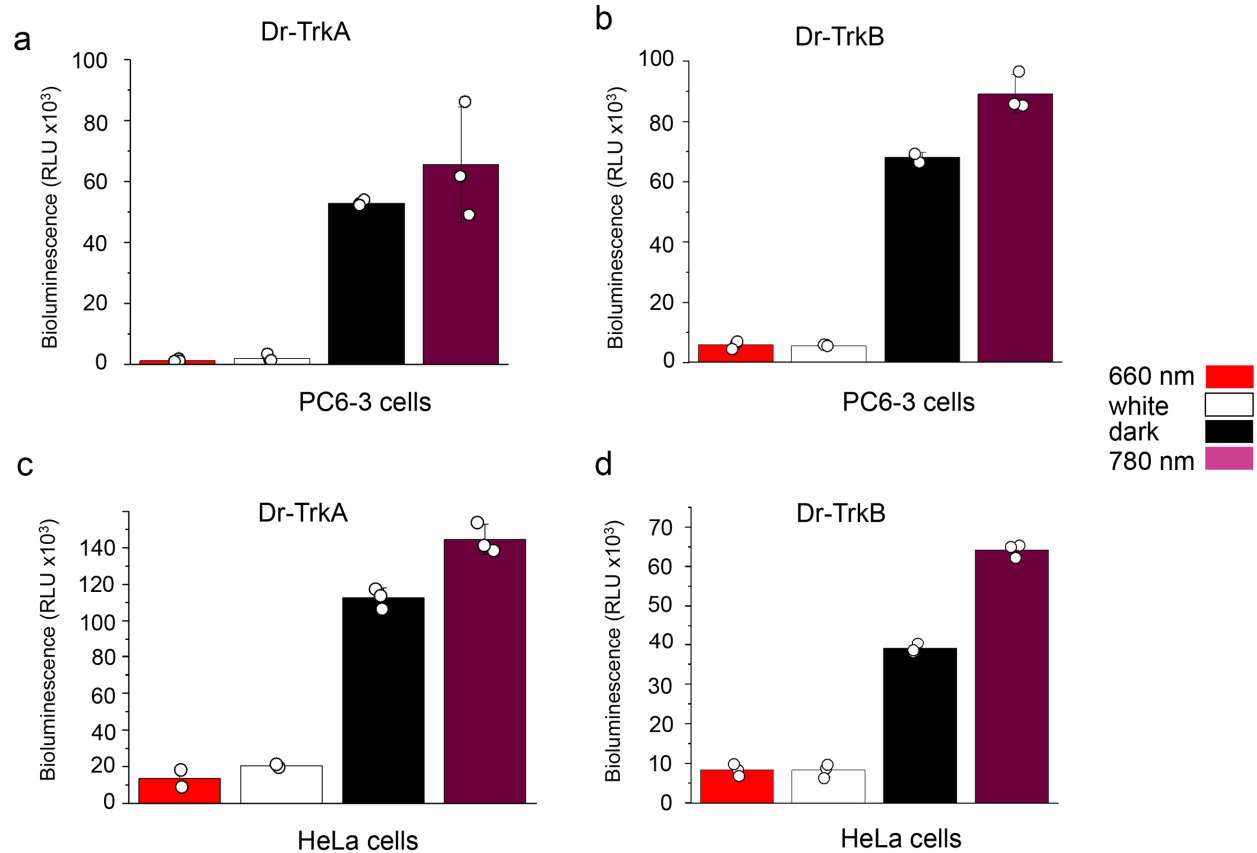

**Supplementary Figure 6. Effect of white, far-red and near-infrared light or darkness on Dr-Trk activation.** (a,b) PC6-3 and (c,d) HeLa cells were transfected with either Dr-TrkA (a,c) or Dr-TrkB (b,d) constructs, grown for 36 h under the respective illumination or in darkness, lysed and analyzed for luciferase expression from the Elk-1-dependent promoter (see Fig. 1c). Error bars represent s.d., n=3 experiments.

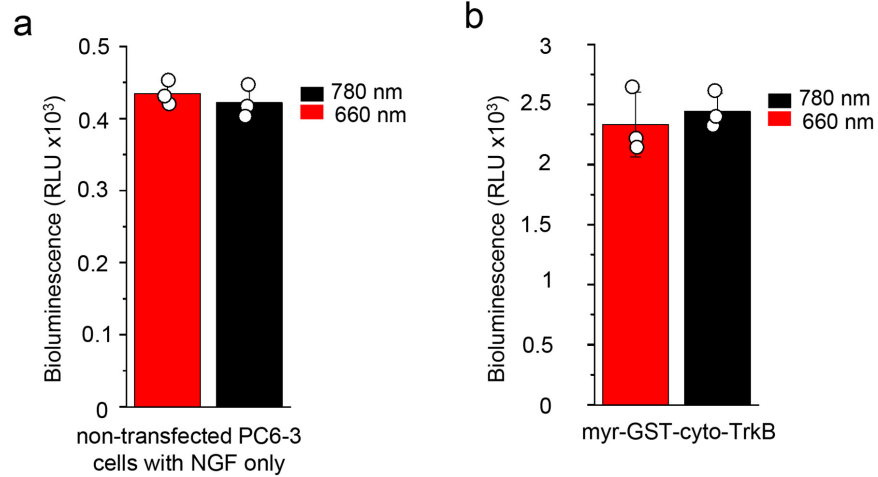

**Supplementary Figure 7. Light-independent regulation of MAPK/ERK signaling in PC6-3 cells.** (a) Luciferase assay of Elk-1-driven transcription in non-transfected PC6-3 cells grown for 30 h in presence of 100 ng/ml NGF under 660 nm or 780 nm light. (b) Luciferase assay of Elk-1-driven transcription in PC6-3 cells expressing myr-GST-TrkB, grown under 660 nm or 780 nm light, and analysed for luciferase activity. Error bars represent s.d., n=3 experiments.

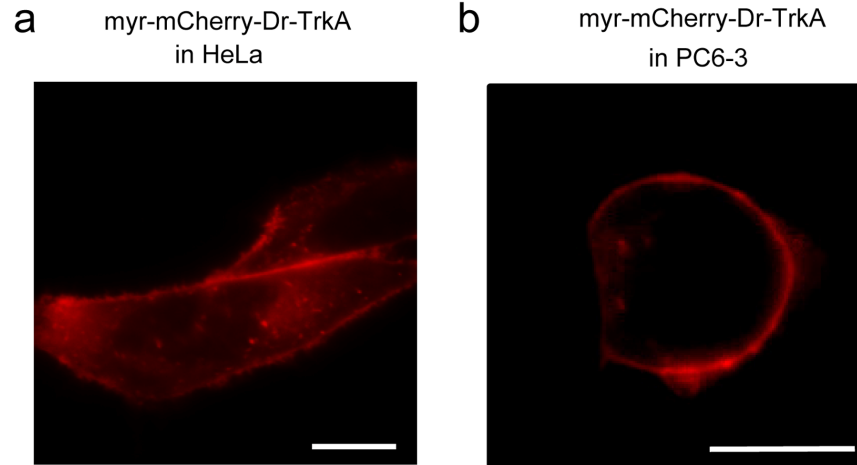

**Supplementary Figure 8. Membrane localization of myristoylated Dr-TrkA.** (a) Epifluorescence image of HeLa cells transfected with pMyr-mCherry-Dr-TrkA plasmid. Scale bar, 10  $\mu$ m. (b) Epifluorescence image of PC6-3 cells transfected by pMyr-mCherry-Dr-TrkA plasmid. Scale bar, 10  $\mu$ m.

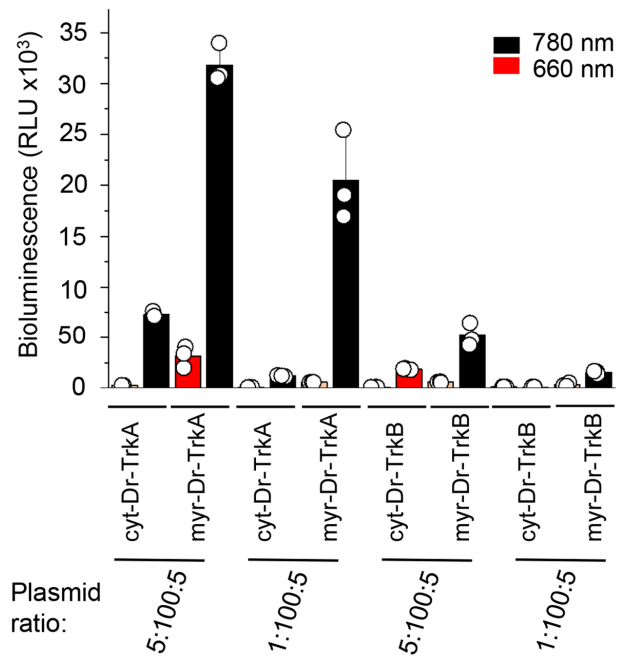

**Supplementary Figure 9. Activity of cytoplasmic cyt-Dr-Trks and membrane-bound myr-Dr-Trks.** Two Dr-Trk, pFr-Luc and pFA-Elk-1 plasmid ratios (5 ng Dr-Trk : 100 ng pFR-Luc : 5 ng pFA-Elk-1, and 1 ng Dr-Trk : 100 ng pFR-Luc : 5 ng pFA-Elk-1) were tested for cytoplasmic and membrane-bound constructs of both Dr-TrkA and Dr-TrkB. The co-transfected PC6-3 were grown under 660 nm or 780 nm light and analysed for luciferase activity. Error bars represent s.d., n=3 experiments.

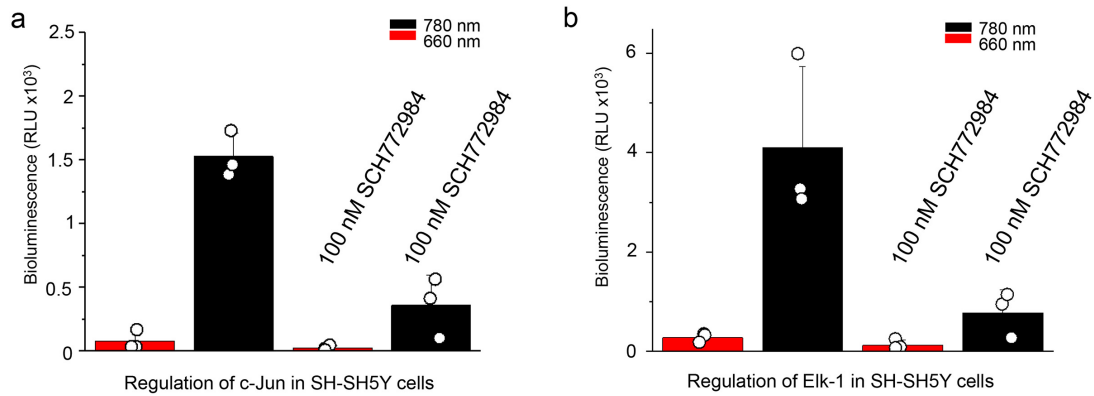

**Supplementary Figure 10. Effect of ERK inhibitor SCH772984 on c-Jun and Elk-1 activation.** SH-SH5Y cells were transfected with Dr-TrkA construct for 36 h, lysed and analyzed by luciferase assay. **(a)** c-Jun –dependent luciferase activity in the cells transfected by Dr-TrkA. The cells were kept under 660 nm and 780 nm light either without or with SCH772984 inhibitor. **(b)** Elk-1 –dependent luciferase activity in the cells transfected by Dr-TrkA. The cells were kept under 660 nm and 780 nm light without or with SCH772984 inhibitor. Error bars represent s.d., n=3 experiments.



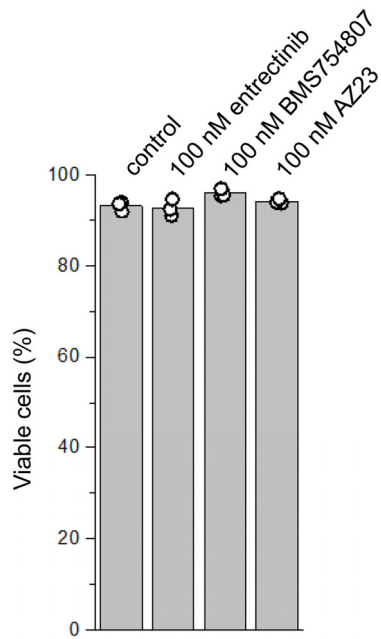

**Supplementary Figure 11. Effect of inhibitors on viability of PC6-3 cells.** Cells were grown for 30 h in the presence of 100 nM of either entrectinib, BMS754807 or AZ23, detached, stained with propidium iodide, and analyzed using flow cytometry. The viable cells for each condition represent a fraction of the propidium iodide-negative cells in the population. Error bars represent s.d., n=3 experiments.

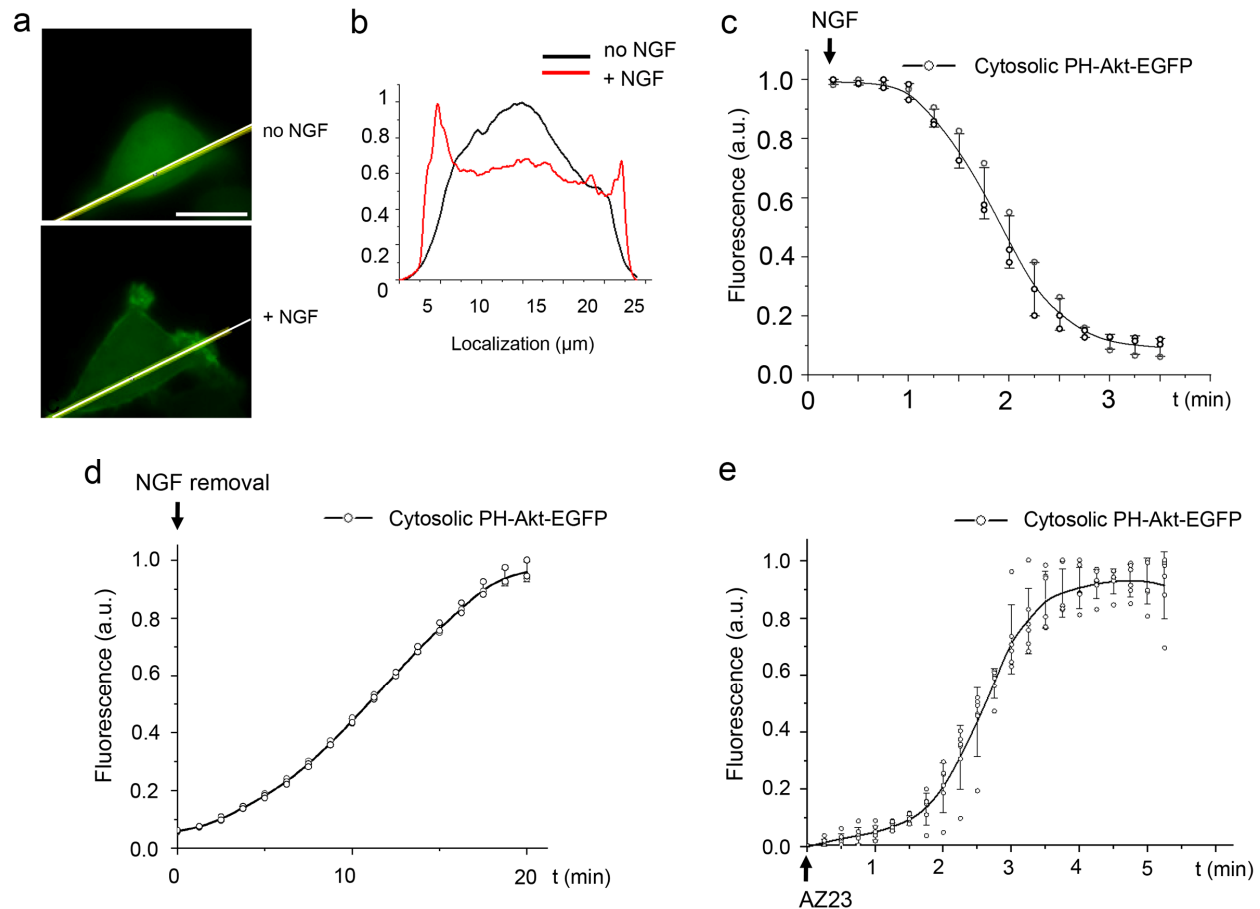

**Supplementary Figure 12. Regulation of PI3K activity by NGF detected by PH-Akt-EGFP relocalization from cytosol to plasma membrane.** (a) Epifluorescence images of PC6-3 cells expressing PH-Akt-EGFP reporter before (top) and 10 min after addition of 50 ng/ml NGF (bottom). Scale bar, 10  $\mu\text{m}$ . (b) Epifluorescence intensity profile of PC6-3 cells expressing PH-Akt-EGFP fluorescence before (black line) and after (red line) addition of 50 ng/ml NGF. (c) Relative decrease of cytosolic PH-Akt-EGFP fluorescence of PC6-3 cells after addition of 50 ng/ml NGF. (d) Relative increase of cytosolic PH-Akt-GFP fluorescence in PC6-3 after NGF removal. (e) Relative increase of cytosolic PH-Akt-EGFP fluorescence of PC6-3 cells after addition of the Trk's specific inhibitor AZ23 (100 nM). Error bars represent s.d., n=3 experiments.

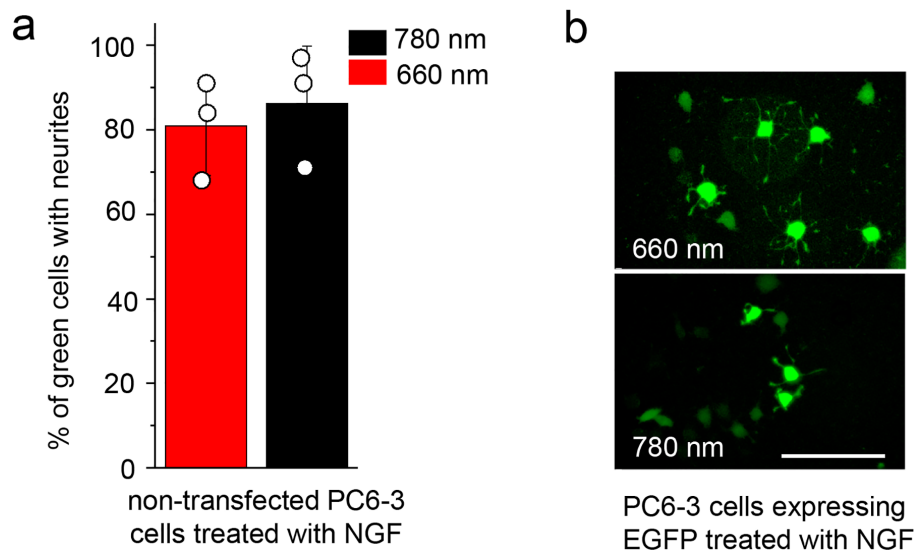

**Supplementary Figure 13. Neurite growth in NGF treated PC6-3 cells.** (a) Quantification of PC6-3 cells bearing neurites grown for 24 h in presence of 50 ng/ml NGF under 660 nm or 780 nm light. (b) Epifluorescence images of PC6-3 cells transfected with pEGFP-C1 and grown for 24 h in presence of 50 ng/ml NGF under 660 nm or 780 nm light. Scale bar, 100  $\mu$ m. Error bars represent s.d., n=3 experiments.

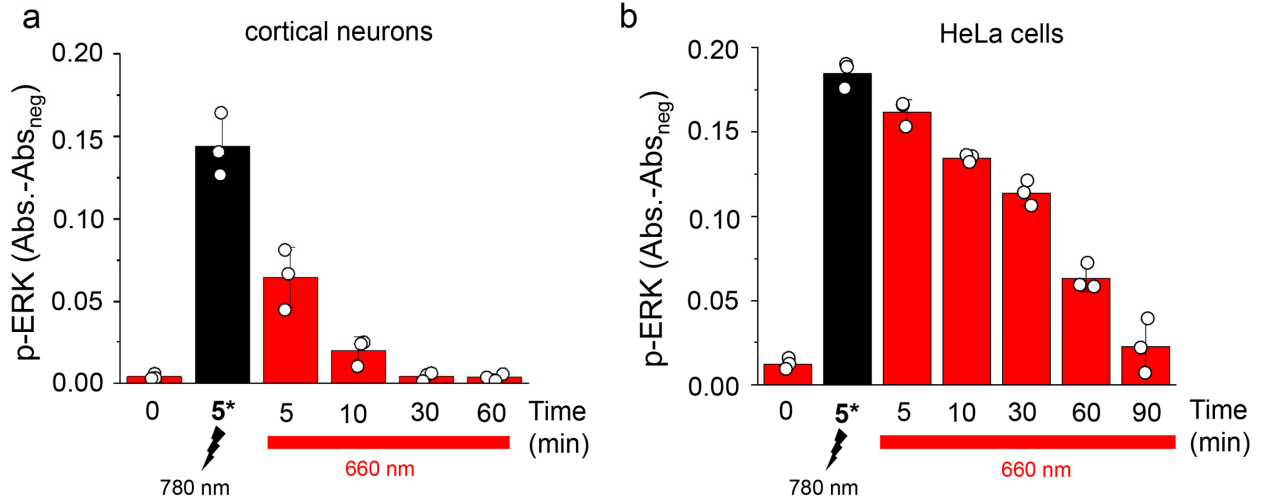

**Supplementary Figure 14. Reversible activation of ERK pathway by Dr-TrkA in cortical neurons and HeLa cells.** (a) Reversible accumulation of phospho-ERK in cultured neurons expressing Dr-TrkA. Neurons were transduced with AAV9 encoding Dr-TrkA construct and kept under 660 nm light. After that, cells were activated by 5 min pulse of 780 nm light and again kept under 660 nm light. At each time point, cells were fixed, permeabilized, probed with anti-phospho-ERK rabbit antibodies and goat anti-rabbit HRP conjugate, and incubated with TMB-ELISA substrate. From left to right: cells kept under 660 nm light, cells illuminated for 5 min with 780 nm light, cells gradually inactivated under 660 nm light for 5, 10, 30 and 60 min. (b) Reversible accumulation of phospho-ERK in HeLa cells expressing Dr-TrkA. Cells were transfected with Dr-TrkA construct and kept under 660 nm light. The other procedures were similar to (a). Error bars represent s.d., n=3 experiments.

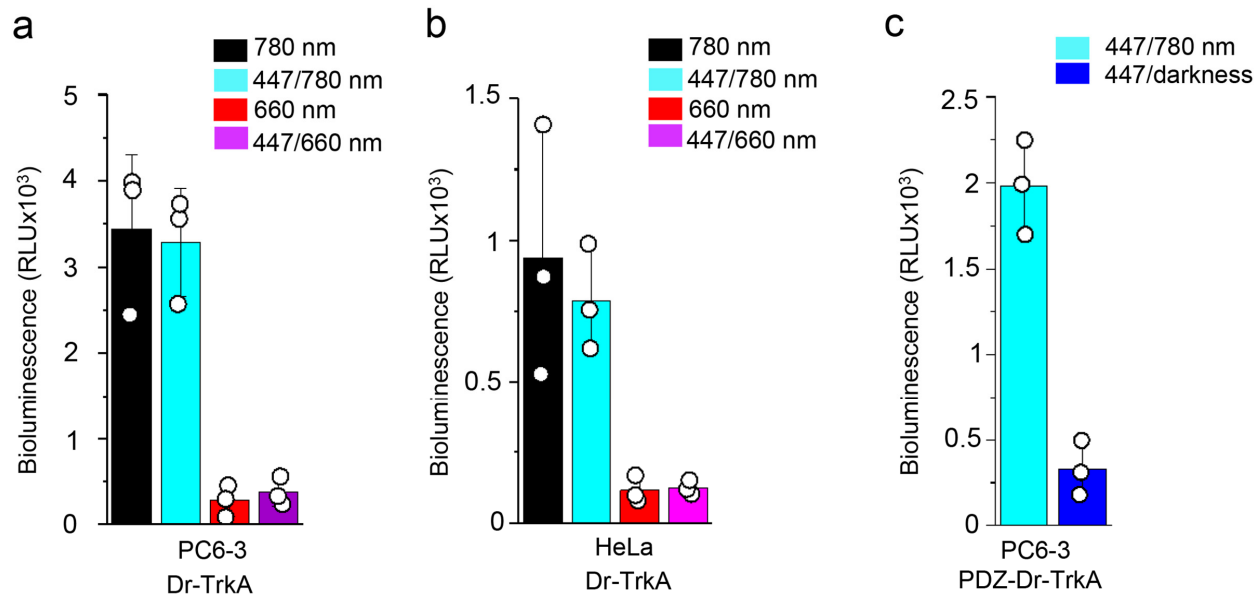

**Supplementary Figure 15. Action of combination of 780 nm with 470 nm light on Dr-TrkA activity.** Luciferase assay of the Elk-1-driven transcription was used (see Fig. 1c). (a) PC6-3 and (b) HeLa cells co-transfected with pDr-TrkA, pFR-Luc, and pFA-Elk-1 plasmids. From left to right: cells were grown under 660 nm light, 780 nm light, 30 s pulse of 447 nm light followed by 5 s pulse of 780 nm light, or 30 s pulse of 447 nm light followed by 5 s pulse of 660 nm light. All light intensities were  $0.3 \text{ mW cm}^{-2}$ . (c) Stimulation of PC6-3 cells co-transfected with pPDZ-Dr-TrkA, pLOVpep-stargazin, pFR-Luc, and pFA-Elk-1 plasmids illuminated with constant 447 nm and constant 780 nm light together or with constant 447 nm light only. Likely, 447 nm light alone photoconverts Dr-TrkA from Pr to Pfr state via a minor absorption band at  $\sim 400 \text{ nm}$  common for bacterial phytochromes, called Soret band, which corresponds to the absorption of individual pyrrole rings of BV. Error bars represent s.d.,  $n=3$  experiments.
