# Supplementary material for: Neurotrophin receptor tyrosine kinases regulated with near-infrared light
Source: PubMed Central journal article supplement (PMC6408446; doi:10.1038/s41467-019-08988-3), 2019-03-08
Supplement: 41467_2019_8988_MOESM3_ESM.pdf [file 41467_2019_8988_MOESM3_ESM.pdf]

## Flow Cytometry Reporting Summary

Form fields will expand as needed. Please do not leave fields blank.

### ▶ Data presentation

For all flow cytometry data, confirm that:

- 1. The axis labels state the marker and fluorochrome used (e.g. CD4-FITC).
- 2. The axis scales are clearly visible. Include numbers along axes only for bottom left plot of group (a 'group' is an analysis of identical markers).
- 3. All plots are contour plots with outliers or pseudocolor plots.
- 4. A numerical value for number of cells or percentage (with statistics) is provided.

### ▶ Methodological details

- |                                                                                        |                                                                                                                                                                                                                                                                                                                                                                  |
|----------------------------------------------------------------------------------------|------------------------------------------------------------------------------------------------------------------------------------------------------------------------------------------------------------------------------------------------------------------------------------------------------------------------------------------------------------------|
| 5. Describe the sample preparation.                                                    | Prior to acquisition, cell pellets were washed with PBS and stained with Annexin V Alexa Fluor 488 Ready Flow Conjugate, R37174, ThermoScientific. At least 50,000 cells per sample were recorded.                                                                                                                                                               |
| 6. Identify the instrument used for data collection.                                   | BD Accuri C6 flow cytometer                                                                                                                                                                                                                                                                                                                                      |
| 7. Describe the software used to collect and analyze the flow cytometry data.          | CFlow Plus, FlowJo v. 7.6.2                                                                                                                                                                                                                                                                                                                                      |
| 8. Describe the abundance of the relevant cell populations within post-sort fractions. | Not applicable                                                                                                                                                                                                                                                                                                                                                   |
| 9. Describe the gating strategy used.                                                  | Initial gates - FSC-A/SSC-A to discriminate cells from debris; then cells were gated in FSC-W/FSC-A to discriminate single cells; then cells were gated in SSC-W/SSC-A to discriminate live cells. Resulted population were analyzed on SSC-A/FL1 to find cells stained with Alexa Fluor 488. Mock transected cells were used for selecting negative population. |

Tick this box to confirm that a figure exemplifying the gating strategy is provided in the Supplementary Information.
